# Supplementary material
Source: PubMed Central journal article supplement (PMC6806425)
Supplement: jamapediatr-173-1137-s002.pdf [file jamapediatr-173-1137-s002.pdf]

## Supplementary Online Content

Urashima M, Mezawa H, Okuyama M, et al. Primary prevention of cow's milk sensitization and food allergy by avoiding supplementation with cow's milk formula at birth: a randomized clinical trial. *JAMA Pediatr*. Published online October 21, 2019. doi:10.1001/jamapediatrics.2019.3544

### **eTable.** Safety Outcomes

This supplementary material has been provided by the authors to give readers additional information about their work.

**eTable. Safety outcomes**

| Outcomes                                     | No. (%) of participants  |                           |           |              |
|----------------------------------------------|--------------------------|---------------------------|-----------|--------------|
|                                              | <b>BF±EF<br/>n = 156</b> | <b>BF+CMF<br/>n = 156</b> | <b>RR</b> | <b>95%CI</b> |
| Admission due to any cause                   | 21 (14)                  | 16 (11)                   | 1.31      | 0.71-2.42    |
| Bronchopneumonia                             | 7 (4.6)                  | 4 (2.6)                   | 1.75      | 0.52-5.85    |
| MCLS <sup>a</sup>                            | 4 (2.6)                  | 3 (2.0)                   | 1.33      | 0.30-5.86    |
| Dehydration                                  | 2 (1.3)                  | 4 (2.6)                   | 0.50      | 0.09-2.69    |
| Congenital anomalies                         | 3 (2.0)                  | 0 (0.0)                   | -         |              |
| Urinary tract infection                      | 2 (1.3)                  | 1 (0.7)                   | 2.00      | 0.18-21.82   |
| Inguinal hernia                              | 1 (0.7)                  | 1 (0.7)                   | 1.00      | 0.06-15.84   |
| Asthmatic bronchitis                         | 1 (0.7)                  | 1 (0.7)                   | 1.00      | 0.06-15.84   |
| Aseptic meningitis                           | 1 (0.7)                  | 1 (0.7)                   | 1.00      | 0.06-15.84   |
| Bone fracture                                | 0 (0.0)                  | 1 (0.7)                   | 0.00      | -            |
| Emergency room visit only                    | 29 (19)                  | 26 (23)                   | 0.81      | 0.52-1.25    |
| Either admission or emergency<br>room visit  | 50 (32)                  | 51 (33)                   | 0.95      | 0.71-1.35    |
| Height at 24 months of age, mean<br>(SD), cm | 84.8 (2.8)               | 84.6 (2.7)                |           |              |
| Weight at 24 months of age,<br>mean (SD), kg | 11.6 (1.1)               | 11.5 (1.2)                |           |              |

a. MCLS, mucocutaneous lymph node syndrome
