# Supplementary material
Source: PubMed Central journal article supplement (PMC6806425)
Supplement: jamapediatr-173-1137-s003.pdf [file jamapediatr-173-1137-s003.pdf]

## Data Sharing Statement

Urashima. Primary Prevention of Cow's Milk Sensitization and Food Allergy by Avoiding Supplementation With Cow's Milk Formula at Birth. *JAMA Pediatr*. Published October 21, 2019.  
10.1001/jamapediatrics.2019.3544

### Data

**Data available:** Yes

**Data types:** Deidentified participant data

**How to access data:** [https://upload.umin.ac.jp/cgi-open-bin/ctr\\_e/ctr\\_view.cgi?recptno=R000013538](https://upload.umin.ac.jp/cgi-open-bin/ctr_e/ctr_view.cgi?recptno=R000013538)

**When available:** With publication

### Supporting Documents

**Document types:** None

### Additional Information

**Who can access the data:** Mitsuyoshi Urashima

**Types of analyses:** for a specified purpose

**Mechanisms of data availability:** after approval of a proposal
